# Supplementary material for: Description of Antimicrobial-Resistant Escherichia coli and Their Dissemination Mechanisms on Dairy Farms
Source: MDPI journal article supplement (doi:10.3390/vetsci10040242), 2023-03-23
Supplement: s1 [file s1]

**Supplementary Table S3.** Correlation between phenotypic and genotypic resistance for various Minimum Concentration Inhibition (MIC) values

| Antimicrobials                 | MIC Values               |                                             |                               |
|--------------------------------|--------------------------|---------------------------------------------|-------------------------------|
|                                | Breakpoints <sup>1</sup> | Epidemiological cut-off values <sup>2</sup> | Best fitting MIC <sup>3</sup> |
| Amoxicillin-clavulanic acid    | 8                        | NONE                                        | 16                            |
| Ampicillin                     | 8                        | 8                                           | 4–32                          |
| Cefoxitin                      | 8                        | 8                                           | 16                            |
| Ceftriaxone                    | 1                        | 0.25                                        | 2–4                           |
| Ceftiofur                      | 2                        | 1                                           | 2–4                           |
| Meropenem                      | 1                        | 0.064                                       | 0.064                         |
| Gentamicin                     | 4                        | 2                                           | 2–4                           |
| Neomycin                       | 8                        | 8                                           | 8                             |
| Streptomycin                   | 32                       | 16                                          | 8                             |
| Spectinomycin                  | 32                       | 64                                          | 16                            |
| Chloramphenicol                | 8                        | 16                                          | 16                            |
| Florfenicol                    | NONE                     | 16                                          | 8                             |
| Nalidixic acid                 | 16                       | 8                                           | 16                            |
| Ciprofloxacin                  | 0.25                     | 0.064                                       | 0.032                         |
| Danofloxacin                   | 0.25                     | NONE                                        | 0.125                         |
| Enrofloxacin                   | 0.25                     | 0.125                                       | 0.125                         |
| Azithromycin                   | 16                       | 16                                          | 8                             |
| Sulfisoxazole                  | 256                      | NONE                                        | 64–128                        |
| Trimethoprim- sulfamethoxazole | 2                        | 0.25                                        | 0.25                          |
| Tetracycline                   | 4                        | 8                                           | 4–8                           |
| Sensitivity                    | 97                       | 95                                          | 99                            |
| Specificity                    | 93                       | 94                                          | 97                            |
| Overall agreement              | 95                       | 94                                          | 98                            |

All MIC values in the table represent the highest concentration for a susceptible phenotype; <sup>1</sup>Breakpoints (intermediate considered as resistant) according to CLSI M100 [22] (*Enterobacteriales* : amoxicillin/clavulanate, ampicillin, azithromycin, cefoxitin, ceftriaxone, chloramphenicol, ciprofloxacin, gentamicin, meropenem, nalidixic acid, sulfisoxazole, tetracycline and trimethoprim/sulfamethoxazole), CLSI VET01S [23] (Bovine Respiratory pathogens : ceftiofur, danofloxacin, enrofloxacin and spectinomycin), or CIPARS [24] (streptomycin). A breakpoint was not available for neomycin, thus the epidemiological cut-off value from EUCAST was used (MIC  $\geq$  16  $\mu$ g/mL was defined as resistant). <sup>2</sup> Values from EUCAST to differentiate wild-type and non wild-type isolates; <sup>3</sup>Minimum inhibition concentration that best match the resistance genes found for isolates describe in this study (n=118)
